# Supplementary material for: Telehealth Acceptability and Feasibility Among People Served in a Community Behavioral Health System During the COVID-19 Pandemic
Source: Atypon-hosted journal article supplement (doi:10.1176/appi.ps.202000623), 2021-05-07
Supplement: appi.ps.202000623.ds001.pdf [file appi.ps.202000623.ds001.pdf]

Table 1. Estimated participation rate by program type

| <b>Program type</b> | <b>Program</b>                                            | <b>Census</b> | <b>Scheduled visits</b> | <b>Number of participants</b> | <b>Estimated participation rate</b> |
|---------------------|-----------------------------------------------------------|---------------|-------------------------|-------------------------------|-------------------------------------|
| <b>Treatment</b>    | Clinic                                                    | 1,927         | 1,003                   | 144                           | 14.4%                               |
| <b>Treatment</b>    | Assertive community treatment/ intensive mobile treatment | 451           | 451                     | 145                           | 32.2%                               |
| <b>Treatment</b>    | Personal recovery oriented services                       | 260           | 260                     | 74                            | 28.5%                               |
| <b>Outreach</b>     | Care coordination and other outreach                      | 2,540         | 847*                    | 225                           | 26.6%                               |
| <b>Housing</b>      | Supportive housing                                        | 1,030         | 1,030**                 | 706                           | 68.5%                               |
| <b>Housing</b>      | Treatment apartment program                               | 342           | 342                     | 188                           | 55.0%                               |
|                     | <b>Total</b>                                              | <b>6,550</b>  | <b>3,933</b>            | <b>1,482</b>                  | <b>37.7%</b>                        |

\*number of scheduled visits for the study period (10 days) estimated as 1/3 of the census, given that each client should receive at least one visit per month

\*\*not possible to estimate number of scheduled visits due to varying visit frequencies; used census as denominator

Table 2. Ordinal logistic regression for survey responses by program type

| Question                                                                                              | Category             | Odds Ratio | Confidence Interval |      | <i>p</i> |
|-------------------------------------------------------------------------------------------------------|----------------------|------------|---------------------|------|----------|
| I feel connected to my case manager/therapist/doctor/nurse/team                                       | Housing v Treatment  | 1.05       | 0.83                | 1.33 | 0.70     |
|                                                                                                       | Outreach v Treatment | 0.79       | 0.57                | 1.09 | 0.15     |
| I can get support when I need it                                                                      | Housing v Treatment  | 1.01       | 0.79                | 1.28 | 0.96     |
|                                                                                                       | Outreach v Treatment | 0.76       | 0.55                | 1.07 | 0.11     |
| I can get an appointment when I want                                                                  | Housing v Treatment  | 0.64       | 0.50                | 0.82 | 0.00     |
|                                                                                                       | Outreach v Treatment | 0.36       | 0.26                | 0.50 | 0.00     |
| I feel comfortable asking about treatment and medications                                             | Housing v Treatment  | 0.99       | 0.65                | 1.49 | 0.95     |
|                                                                                                       | Outreach v Treatment | 0.74       | 0.44                | 1.25 | 0.26     |
| Staff talk to me about specific goals for my health                                                   | Housing v Treatment  | 0.94       | 0.59                | 1.48 | 0.78     |
|                                                                                                       | Outreach v Treatment | 1.08       | 0.57                | 2.06 | 0.81     |
| Staff are sensitive to my traumatic or difficult experiences                                          | Housing v Treatment  | 2.11       | 1.43                | 3.10 | 0.00     |
|                                                                                                       | Outreach v Treatment | 1.14       | 0.70                | 1.86 | 0.60     |
| The quality of my life is improving                                                                   | Housing v Treatment  | 1.20       | 0.92                | 1.57 | 0.17     |
|                                                                                                       | Outreach v Treatment | 0.58       | 0.41                | 0.81 | 0.00     |
| Staff: Please assess the degree to which your client is experiencing distress because of the pandemic | Housing v Treatment  | 1.77       | 1.37                | 2.30 | 0.00     |
|                                                                                                       | Outreach v Treatment | 1.30       | 0.92                | 1.85 | 0.14     |

Table 3. Ordinal logistic regressions of survey responses by year, 2020 vs. 2018

| Question                                                     | Odds Ratio | Confidence Interval |       | <i>p</i> |
|--------------------------------------------------------------|------------|---------------------|-------|----------|
| I feel comfortable asking about treatment and medications    | 1.008      | 0.929               | 1.093 | .850     |
| Staff talk to me about specific goals for my health          | 1.004      | 0.925               | 1.089 | .929     |
| Staff are sensitive to my traumatic or difficult experiences | 1.003      | 0.924               | 1.089 | .936     |
| The quality of my life is improving                          | 1.280      | 1.182               | 1.387 | .000     |

Table 4. Ordinal logistic regression of Supporting Remotely Questions by Distress

| Question                                                        | Odds Ratio | Confidence Interval |       | <i>p</i> |
|-----------------------------------------------------------------|------------|---------------------|-------|----------|
| I feel connected to my case manager/therapist/doctor/nurse/team | 1.381      | 1.134               | 1.684 | .001     |
| I can get support when I need it                                | 1.454      | 1.187               | 1.779 | .000     |
| I can get an appointment when I want                            | 1.487      | 1.211               | 1.827 | .000     |
| I feel comfortable asking about treatment and medications       | 1.199      | 0.979               | 1.468 | .078     |
| Staff talk to me about specific goals for my health             | 1.077      | 0.877               | 1.322 | .482     |
| Staff are sensitive to my traumatic or difficult experiences    | 1.045      | 0.851               | 1.283 | .673     |
| The quality of my life is improving                             | 1.856      | 1.525               | 2.258 | .000     |
